# Supplementary material for: Association of Oral and General Health with Nutritional Status of Older Adults Attending Two Medical Centers in Riyadh, Saudi Arabia: A Cross-Sectional Study
Source: MDPI journal article supplement (doi:10.3390/nu15184032), 2023-09-18
Supplement: s1 [file s1]

Table S1: Mini Nutritional Assessment results for each question

| Item of the questionnaire                                                                                                               | Number (%)         |
|-----------------------------------------------------------------------------------------------------------------------------------------|--------------------|
| <b>Has food intake declined over the past 3 months due to loss of appetite, digestive problems, chewing or swallowing difficulties?</b> |                    |
| Severe decrease in food intake                                                                                                          | 63(24.1)           |
| Moderate decrease in food intake                                                                                                        | 76(29.1)           |
| No decrease in food intake                                                                                                              | 122(46.8)          |
| <b>Weight loss during the last 3 months</b>                                                                                             |                    |
| Weight loss greater than 3 kg (6.6 lbs)                                                                                                 | 110(42.1)          |
| Does not know                                                                                                                           | 21(8.0)            |
| Weight loss between 1 and 3 kg (2.2 and 6.6 lbs)                                                                                        | 24(9.2)            |
| No weight loss                                                                                                                          | 106(40.6)          |
| <b>Mobility</b>                                                                                                                         |                    |
| Bed or chair bound                                                                                                                      | 69(26.4)           |
| Able to get out of bed / chair but does not go out                                                                                      | 49(18.8)           |
| Goes out                                                                                                                                | 143(54.8)          |
| <b>Has suffered psychological stress or acute disease in the past 3 months?</b>                                                         |                    |
| Yes                                                                                                                                     | 54(20.7)           |
| No                                                                                                                                      | 207(79.3)          |
| <b>Neuropsychological problems</b>                                                                                                      |                    |
| Severe dementia or depression                                                                                                           | 19(7.3)            |
| Mild dementia                                                                                                                           | 34(13)             |
| No psychological problems                                                                                                               | 208(79.7)          |
| <b>Body Mass Index (BMI) (weight in kg) / (height in m)<sup>2</sup></b>                                                                 | <b>(mean ±SD)</b>  |
| BMI less than 19                                                                                                                        | 7(2.7) 16.9±1.9    |
| BMI 19 to less than 21                                                                                                                  | 13(5.1) 20.2±0.6   |
| BMI 21 to less than 23                                                                                                                  | 24(9.2) 21.8±0.5   |
| BMI 23 or greater                                                                                                                       | 217(83.1) 30.9±6.3 |
| <b>Overall Total (mean +/-SD)</b>                                                                                                       | <b>(10 ± 3)</b>    |
| <b>MNA Category</b>                                                                                                                     | <b>(mean ±SD)</b>  |
| <b>Normal nutritional status</b>                                                                                                        | 89(34.1) 13.2±0.8  |
| <b>At risk of malnutrition</b>                                                                                                          | 121(46.4) 9.5±1.0  |
| <b>Malnourished</b>                                                                                                                     | 51(19.5) 5.4±1.6   |

Table S2: OHIP-5 scale scores and nutritional status of the subjects\*

| the Oral Health Impact Profile                                                                                             | Total number (%) | MNA score                               |                                       |                            | P value |
|----------------------------------------------------------------------------------------------------------------------------|------------------|-----------------------------------------|---------------------------------------|----------------------------|---------|
|                                                                                                                            |                  | Normal nutritional status<br>Number (%) | At risk of malnutrition<br>Number (%) | Malnourished<br>Number (%) |         |
| Have you had difficulty chewing any foods because of problems with your teeth, mouth, dentures, or jaw?                    |                  |                                         |                                       |                            |         |
| Total OHIP-5 score                                                                                                         |                  |                                         |                                       |                            |         |
| Never                                                                                                                      | 142(54.4)        | 63(70.7)                                | 64(52.80)                             | 15(29.4)                   | <0.001  |
| Hardly ever                                                                                                                | 11(4.2)          | 3(3.3)                                  | 6(4.9)                                | 2(3.9)                     |         |
| Occasionally                                                                                                               | 47(18)           | 14(15.7)                                | 24(19.8)                              | 9(17.6)                    |         |
| Often                                                                                                                      | 30(11.5)         | 7(7.8)                                  | 12(9.9)                               | 11(21.5)                   |         |
| Very often                                                                                                                 | 31(11.9)         | 2(2.2)                                  | 15(12.4)                              | 14(27.4)                   |         |
| Have you had painful aching in your mouth?                                                                                 |                  |                                         |                                       |                            |         |
| Never                                                                                                                      | 162(62)          | 67(75.2)                                | 73(60.3)                              | 22(43.1)                   | <0.001  |
| Hardly ever                                                                                                                | 13(5)            | 4(4.4)                                  | 7(5.7)                                | 2(3.9)                     |         |
| Occasionally                                                                                                               | 48(18.4)         | 12(13.4)                                | 23(19.0)                              | 13(25.4)                   |         |
| Often                                                                                                                      | 23(8.8)          | 6(6.7)                                  | 7(5.7)                                | 10(19.6)                   |         |
| Very often                                                                                                                 | 15(5.8)          | 0(0)                                    | 11(9.0)                               | 4(7.8)                     |         |
| Total Number (Mean±SD)                                                                                                     |                  | 89(1.5±0.9)                             | 121(1.9±1.4)                          | 51(2.4±1.4)                |         |
| Have you felt uncomfortable about the appearance of your teeth, mouth, dentures, or jaws?                                  |                  |                                         |                                       |                            |         |
| Never                                                                                                                      | 190(72.8)        | 73(82.0)                                | 86(71.0)                              | 31(60.7)                   | 0.008   |
| Hardly ever                                                                                                                | 20(7.7)          | 7(7.8)                                  | 9(7.4)                                | 4(7.8)                     |         |
| Occasionally                                                                                                               | 20(7.7)          | 4(4.4)                                  | 9(7.4)                                | 7(13.7)                    |         |
| Often                                                                                                                      | 15(5.7)          | 4(4.4)                                  | 6(4.9)                                | 5(9.8)                     |         |
| Very often                                                                                                                 | 16(6.1)          | 1(1.1)                                  | 11(9.0)                               | 4(7.8)                     |         |
| Total Number (Mean±SD)                                                                                                     |                  | 89(1.3±0.85)                            | 121(1.7±1.3)                          | 51(2±1.4)                  |         |
| Have you felt that there has been less flavour in your food because of problems with your teeth, mouth, dentures, or jaws? |                  |                                         |                                       |                            |         |
| Never                                                                                                                      | 200(76.6)        | 78(87.6)                                | 93(76.8)                              | 29(56.8)                   | <0.001  |
| Hardly ever                                                                                                                | 15(5.7)          | 5(5.6)                                  | 4(3.3)                                | 6(11.7)                    |         |
| Occasionally                                                                                                               | 20(7.7)          | 2(2.2)                                  | 11(9.0)                               | 7(13.7)                    |         |
| Often                                                                                                                      | 15(5.7)          | 4(4.4)                                  | 6(4.9)                                | 5(9.8)                     |         |
| Very often                                                                                                                 | 11(4.2)          | 0(0)                                    | 7(5.7)                                | 4(7.8)                     |         |
| Total Number (Mean±SD)                                                                                                     |                  | 89(1.2±0.7)                             | 121(1.6±1.3)                          | 51(2±1.3)                  |         |
| Have you had difficulty doing your usual jobs because of problems with your teeth, mouth, dentures, or jaws?               |                  |                                         |                                       |                            |         |
| Never                                                                                                                      | 210(80.5)        | 78(87.6)                                | 98(80.9)                              | 34(66.6)                   | <0.001  |
| Hardly ever                                                                                                                | 17(6.5)          | 6(6.7)                                  | 11(9.0)                               | 0(0)                       |         |
| Occasionally                                                                                                               | 13(5)            | 2(2.2)                                  | 3(2.4)                                | 8(15.6)                    |         |
| Often                                                                                                                      | 12(4.6)          | 3(3.3)                                  | 5(4.1)                                | 4(7.8)                     |         |
| Very often                                                                                                                 | 9(3.4)           | 0(0)                                    | 4(3.3)                                | 5(9.8)                     |         |

Table S3 shows all the 36-SF questions for the general health domain and for the normal, at-risk, and malnourished groups' respective mean scores

| 36 Health Survey Questionnaire   |                       | Normal nutritional status<br>(Mean±SD) | At risk of malnutrition<br>(Mean±SD) | Malnourished<br>(Mean±SD) | p value |
|----------------------------------|-----------------------|----------------------------------------|--------------------------------------|---------------------------|---------|
| <b>Physical Health</b>           |                       |                                        |                                      |                           |         |
| <b>Physical Functioning (PF)</b> |                       |                                        |                                      |                           |         |
| 3a                               | Vigorous activities   | 21.9±31.9                              | 13.6±26.6                            | 1.9±9.8                   | <0.001  |
| 3b                               | Moderate activities   | 43.8±40.4                              | 24.3±34.2                            | 5.88±19.0                 | <0.001  |
| 3c                               | Lift, Carry Groceries | 59.5±39.0                              | 43.3±40.7                            | 14.7±28.7                 | <0.001  |
| 3d                               | Climb Several flights | 40.4±40.5                              | 20.2±33.8                            | 5.88±16.2                 | <0.001  |
| 3e                               | Climb One flight      | 58.9±42.3                              | 33.8±40.9                            | 12.7±29.7                 | <0.001  |
| 3f                               | Bend, Kneel           | 59.5±37.5                              | 40.9±36.5                            | 21.5±32.0                 | <0.001  |
| 3g                               | Walk mile             | 31.4±40.1                              | 19.0±33.0                            | 5.88±19.0                 | <0.001  |
| 3h                               | Walk Several blocks   | 43.8±41.8                              | 26.0±38.2                            | 8.8±21.6                  | <0.001  |
| 3i                               | Walk one Block        | 68.5±37.2                              | 45.8±41.6                            | 15.6±29.1                 | <0.001  |
| 3j                               | Bathe, Dress          | 82.5±30.2                              | 61.5±39.1                            | 27.4±37.8                 | <0.001  |
| <b>Role-Physical (RP)</b>        |                       |                                        |                                      |                           |         |
| 4a                               | Cut Down time         | 38.2±48.8                              | 16.5±37.2                            | 3.9±19.6                  | <0.001  |
| 4b                               | Accomplished Less     | 34.8±47.9                              | 14.8±35.7                            | 3.9±19.6                  | <0.001  |
| 4c                               | Limited in kind       | 35.9±48.2                              | 16.5±37.2                            | 5.8±23.7                  | <0.001  |
| 4d                               | Had difficulty        | 33.7±47.5                              | 15.7±36.5                            | 3.9±19.6                  | <0.001  |
| <b>Bodily Pain (BP)</b>          |                       |                                        |                                      |                           |         |
| 7                                | Pain-Magnitude        | 46.9±25.2                              | 33.5±22.6                            | 28.6±23.0                 | <0.001  |
| 8                                | Pain-interfere        | 71.9±24.3                              | 50.6±31.5                            | 28.4±23.4                 | <0.001  |
| <b>General Health (GH)</b>       |                       |                                        |                                      |                           |         |
| 1                                | EVGFP rating          | 47.7±22.8                              | 32.0±24.6                            | 23.0±21.1                 | <0.001  |
| 11a                              | Sick Easier           | 51.1±17.6                              | 48.5±21.4                            | 35.7±23.5                 | <0.001  |
| 11b                              | As healthy            | 50.5±19.2                              | 44.8±20.1                            | 44.6±22.5                 | 0.0939  |
| 11c                              | Health to get worse   | 53.0±16.7                              | 52.2±15.8                            | 44.6±24.1                 | 0.0176  |
| 11d                              | Health Excellent      | 55.8±16.4                              | 49.5±22.5                            | 38.2±22.5                 | <0.001  |
| <b>Mental Health</b>             |                       |                                        |                                      |                           |         |
| <b>Vitality (VT)</b>             |                       |                                        |                                      |                           |         |
| 9a                               | Pep/life              | 38.2±27.2                              | 24.4±24.0                            | 9.8±12.8                  | <0.001  |
| 9e                               | Energy                | 35.0±28.3                              | 20.6±26.3                            | 17.2±26.2                 | <0.001  |
| 9g                               | Worn out              | 67.8±25.1                              | 51.0±26.5                            | 35.2±28.1                 | <0.001  |
| 9i                               | Tired                 | 59.1±21.7                              | 43.8±21.9                            | 29.8±25.4                 | <0.001  |
| <b>Social Functioning (SF)</b>   |                       |                                        |                                      |                           |         |
| 6                                | Social-Extent         | 74.1±23.3                              | 53.9±31.1                            | 26.4±26.6                 | <0.001  |
| 10                               | Social-Time           | 71.6±24.7                              | 54.5±30.7                            | 25.9±29.1                 | <0.001  |
| <b>Role-Emotional (RE)</b>       |                       |                                        |                                      |                           |         |
| 5a                               | Cut down time         | 44.9±50.0                              | 26.4±44.2                            | 9.8±30.0                  | <0.001  |
| 5b                               | Accomplished less     | 46.0±50.1                              | 27.2±44.7                            | 11.7±32.5                 | <0.001  |
| 5c                               | Not careful           | 46.0±50.1                              | 23.9±42.8                            | 11.7±32.5                 | <0.001  |
| <b>Mental Health (MH)</b>        |                       |                                        |                                      |                           |         |
| 9b                               | Nervous               | 67.6±24.7                              | 60.1±26.6                            | 54.5±33.4                 | 0.0194  |
| 9c                               | Down in dumps         | 81.7±21.8                              | 63.6±28.1                            | 46.6±30.6                 | <0.001  |
| 9d                               | Peaceful              | 45.8±27.0                              | 40.6±25.0                            | 45.4±28.0                 | 0.3028  |
| 9f                               | Blue/Sad              | 74.8±21.2                              | 59.8±28.4                            | 45.0±30.4                 | <0.001  |
| 9h                               | Happy                 | 45.6±27.3                              | 32.8±26.4                            | 28.2±23.0                 | <0.001  |
